# Supplementary material for: RG7386, a Novel Tetravalent FAP-DR5 Antibody, Effectively Triggers FAP-Dependent, Avidity-Driven DR5 Hyperclustering and Tumor Cell Apoptosis
Source: Oxford University Press journal article supplement (doi:10.1158/1535-7163.mct-15-0647), 2016-04-01
Supplement: 15357163mct150647-sup-153457_1_supp_3209937_nx6h0n.docx [file 15357163mct150647-sup-153457_1_supp_3209937_nx6h0n.docx]

**RG7386, a novel tetravalent FAP-DR5 antibody, effectively triggers FAP-dependent, avidity-driven DR5 hyperclustering and tumor cell apoptosis**

Brünker et al Supplementary Results 3

- Supplementary Figure 2 and associated figure legend

- Supplementary Table 4


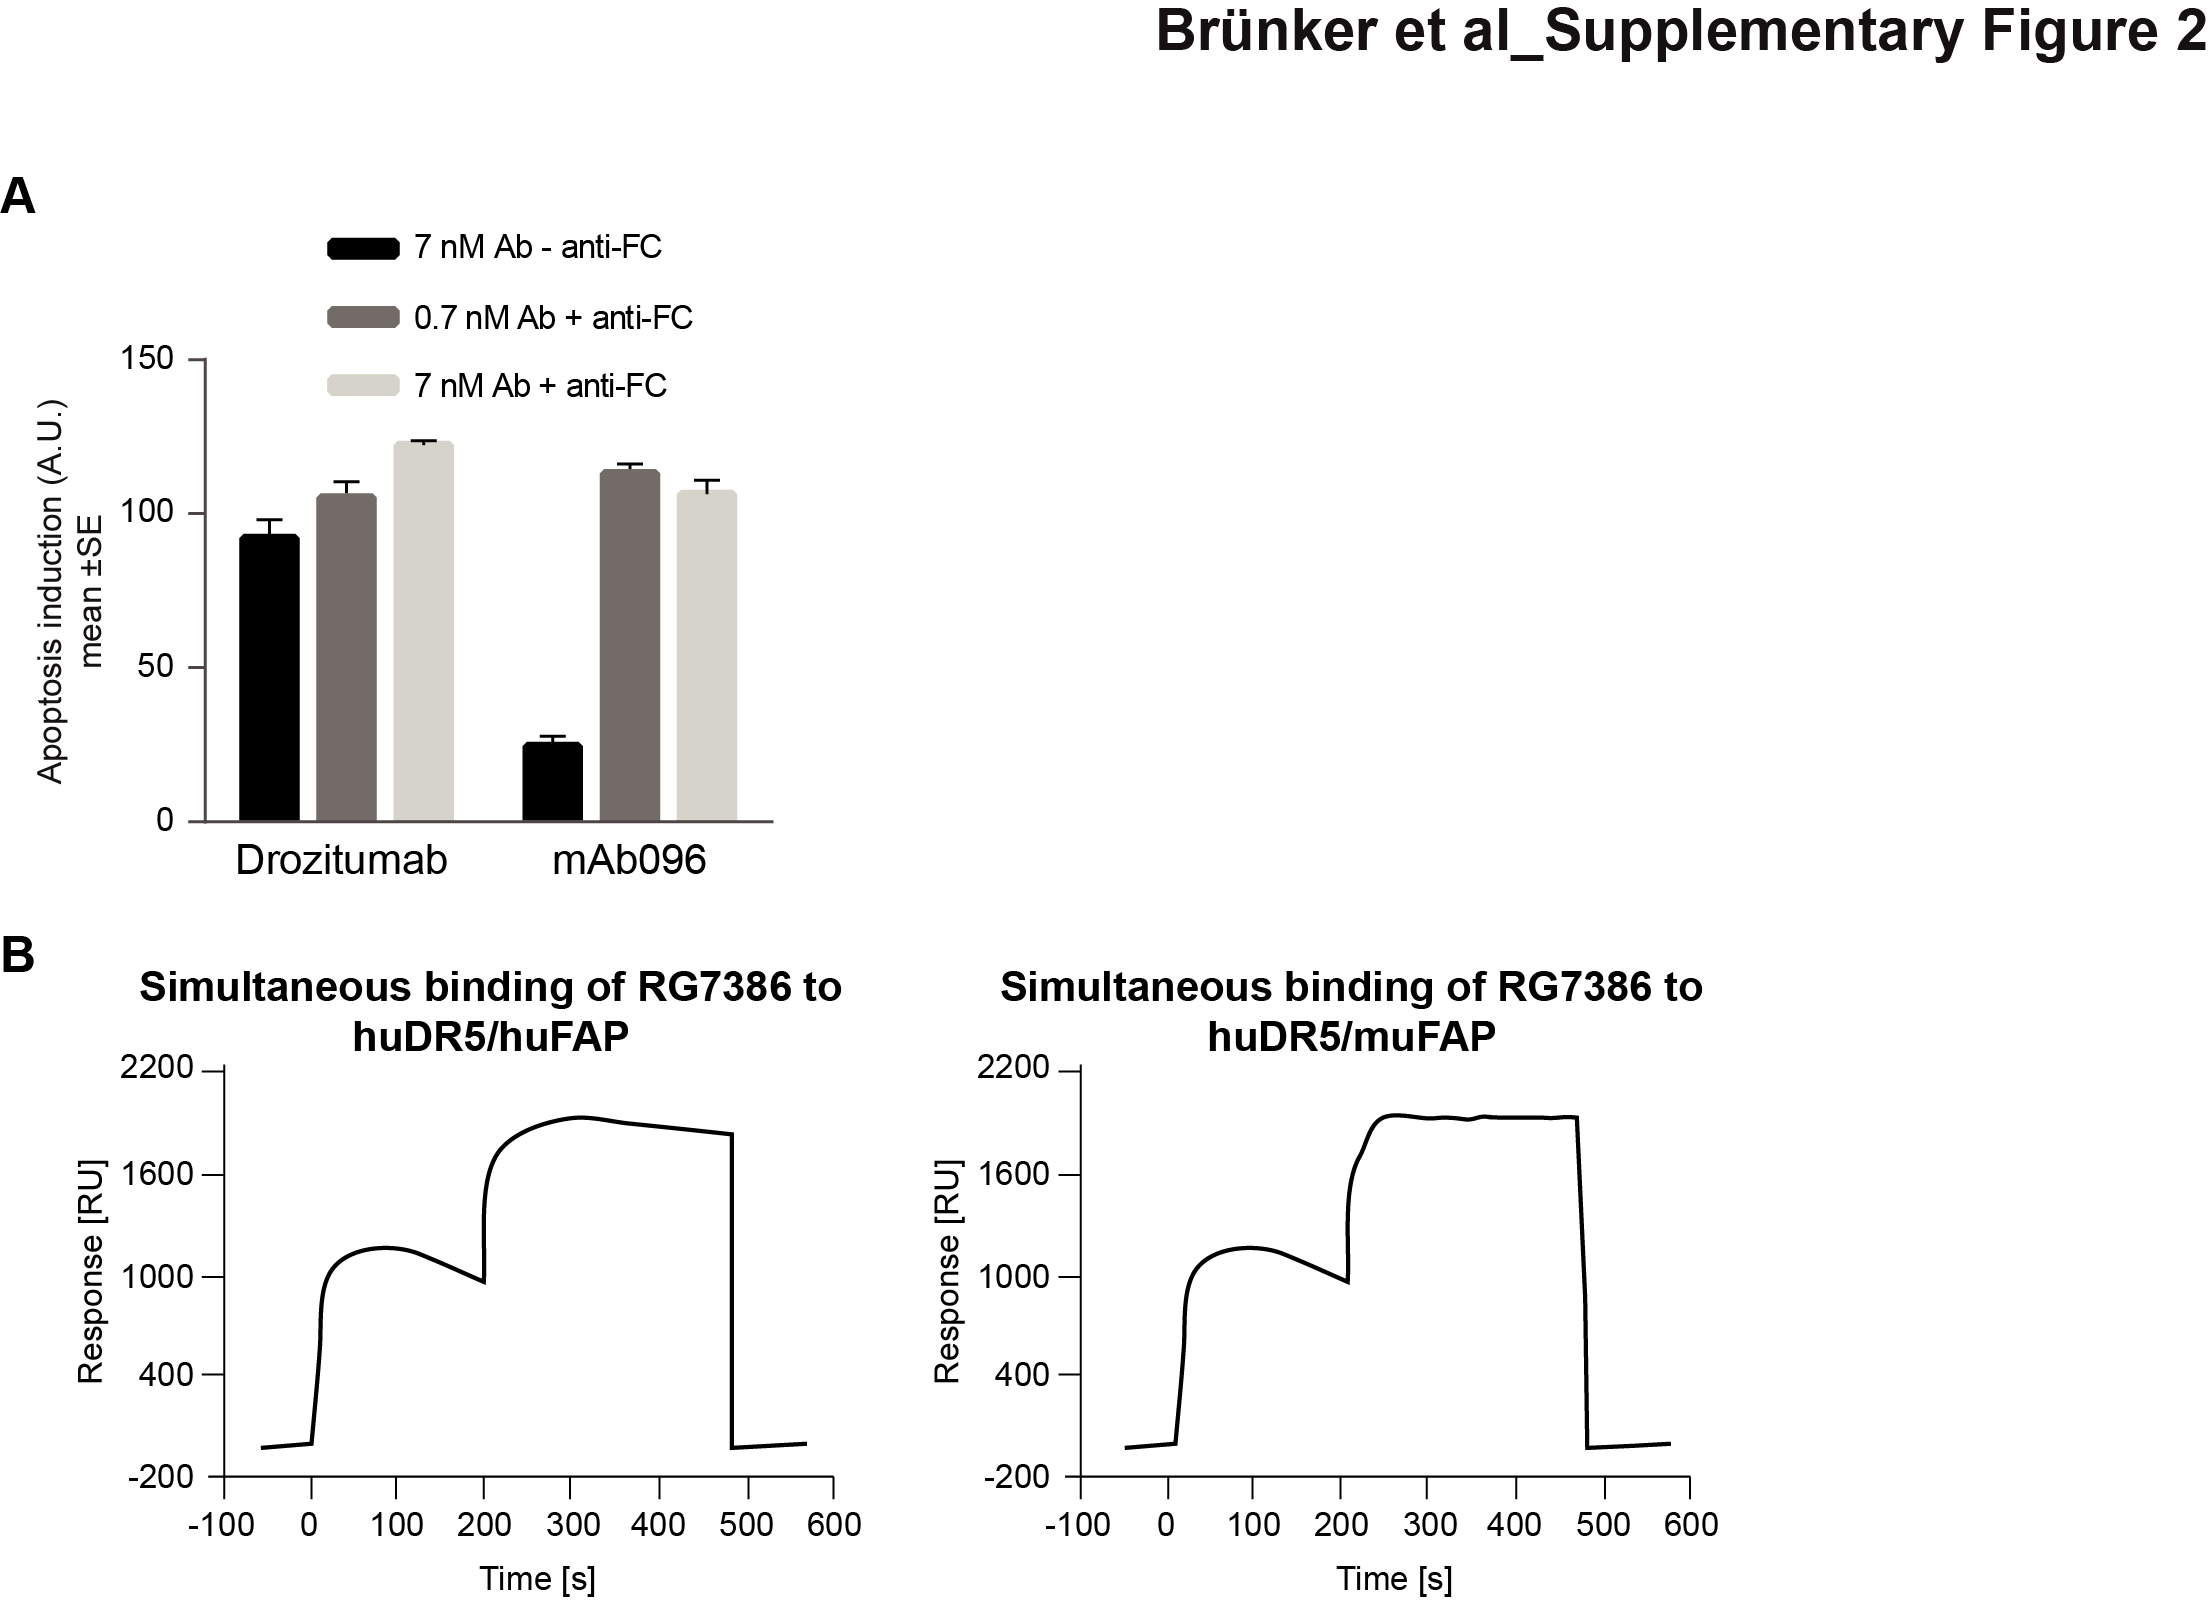


**Figure S2. Related to Figure 3. *In vitro* characterization of the FAP-DR5 BsAb RG7386.** (A) Comparison of crosslinking-independent apoptotic activities of drozitumab and the novel DR5 agonistic antibody mAb096 (used in the RG7386 bispecific molecule) in MDA-MB-231 cells. (B) Simultaneous binding of RG7386 to huDR5 followed by huFAP or muFAP recombinant proteins assessed by surface plasmon resonance.

|  | **Binding to FAP KD (nM)** | **Binding to DR5 KD (nM)** |
| --- | --- | --- |
| **Human** | 0.52 | 1.9 |
| **Cynomolgus monkey** | N.D. | 0.63 |
| **Specificity of individual Ab clones** | mAb082:  No binding to huDPP-IV (CD26, closest FAP homologue) | mAb096:  No binding to huDR4, DcR1/2, OPG |

**Table S4.** **Characterization of RG7386 binding avidities.** RG7386 binding to FAP and DR5 was determined in a TagLite binding assay. HuDPP-IV: human dipeptidyl peptidase IV; DcR: decoy receptor; OPG: osteoprotegerin.
