# Supplementary material for: RG7386, a Novel Tetravalent FAP-DR5 Antibody, Effectively Triggers FAP-Dependent, Avidity-Driven DR5 Hyperclustering and Tumor Cell Apoptosis
Source: Oxford University Press journal article supplement (doi:10.1158/1535-7163.mct-15-0647), 2016-04-01
Supplement: 15357163mct150647-sup-153457_1_supp_3209939_nx6h0n.docx [file 15357163mct150647-sup-153457_1_supp_3209939_nx6h0n.docx]

**RG7386, a novel tetravalent FAP-DR5 antibody, effectively triggers FAP-dependent, avidity-driven DR5 hyperclustering and tumor cell apoptosis**

Brünker et al Supplementary Results 5

- Supplementary Figure 4 and associated figure legend


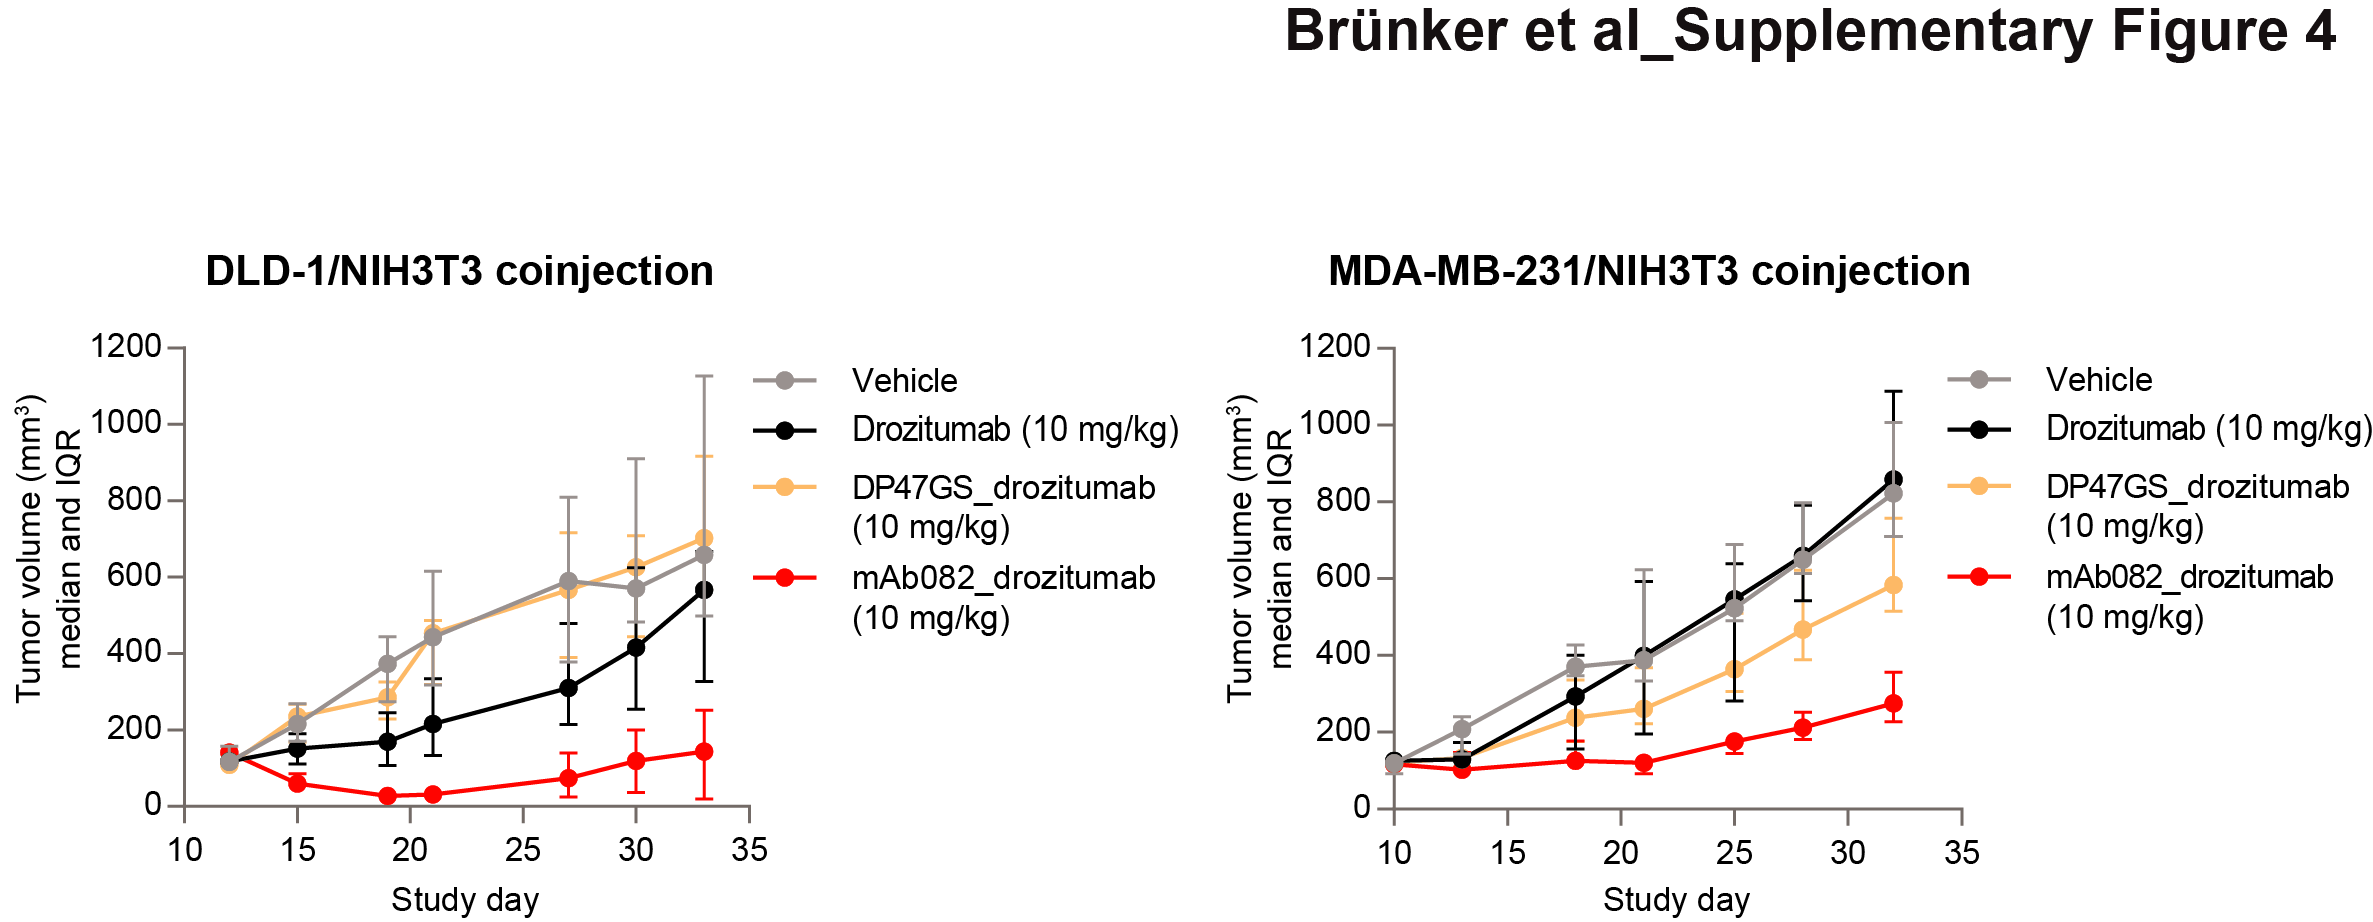


**Figure S4. Related to Figure 4. FAP-drozitumab BsAb induces tumor growth inhibition *in vivo*.** Analysis of tumor growth inhibition in a DLD-1/NIH3T3 and MDA-MB-231/NIH3T3 co-injection mouse models in response to the FAP-DR5 BsAb mAb082_drozitumab or drozitumab coupled to the non-targeting DP47GS IgG (median tumor volume and IQR).
